# Supplementary material
Source: PubMed Central journal article supplement (PMC5339841)
Supplement: cr201726x1.pdf [file cr201726x1.pdf]

**Supplementary information, Table S1 List of miRNA candidates involved in the initial screening, related to Figure 1B.**

| miRNA        | Expression in normal- (NE) or dys- (DE) erythropoiesis              | Function in erythropoiesis                    | Species                 | Target                | References*                                                                                                                                 |
|--------------|---------------------------------------------------------------------|-----------------------------------------------|-------------------------|-----------------------|---------------------------------------------------------------------------------------------------------------------------------------------|
| miR-23a      | Upregulation in NE                                                  | Positive                                      | Human, zebrafish        | SHP2                  | (Zhu et al., 2013)                                                                                                                          |
| miR-433      | Upregulation in DE (myeloproliferative neoplasms, MPNs)             | Negative                                      | human                   | GBP2                  | (Lin et al., 2013)                                                                                                                          |
| miR-191      | Downregulation in NE                                                | Negative *<br>*: blocks erythroid enucleation | Mouse                   | Riok3 and Mxi1        | (Zhang et al., 2011b)                                                                                                                       |
| miR-126/126* | N/A                                                                 | Negative                                      | Human, zebrafish        | PTPN9                 | (Grabher et al., 2011; Huang et al., 2011)                                                                                                  |
| miR-451      | Upregulation in NE; Upregulation in DE ( Polycythemia vera, PV)     | Positive                                      | Mouse, human, zebrafish | 14-3-3zeta and GATA-2 | (Bruchova-Votava et al., 2010; Bruchova et al., 2007; Pase et al., 2009; Patrick et al., 2010; Rasmussen et al., 2010; Svasti et al., 2010) |
| miR-223      | Downregulation in NE                                                | Negative                                      | human                   | LMO2                  | (Felli et al., 2009; Yuan et al., 2009)                                                                                                     |
| miR-150      | Downregulation in NE; Downregulation in DE ( Polycythemia vera, PV) | Negative                                      | human                   | MYB                   | (Bruchova et al., 2007; Lu et al., 2008)                                                                                                    |
| miR-124      | Downregulation in DE (myelodysplastic syndrome, MDS)                | Modulates self-renewal of HSCs                | Human, mouse            | N/A                   | (Dickstein et al., 2010; Vazquez et al., 2010)                                                                                              |
| miR-221/222  | Downregulation in NE; Downregulation in DE ( Polycythemia vera, PV) | Negative                                      | human                   | KIT                   | (Bruchova et al., 2007; Felli et al., 2005)                                                                                                 |
| miR-15a/16   | Upregulation in NE; Upregulation in DE                              | Increase HbF production                       | human                   | MYB                   | (Bruchova et al., 2007; Choong et                                                                                                           |

|                                             |                                                                     |                                          |       |                                                    |                                                              |
|---------------------------------------------|---------------------------------------------------------------------|------------------------------------------|-------|----------------------------------------------------|--------------------------------------------------------------|
|                                             | ( Polycythemia vera, PV)                                            |                                          |       |                                                    | al., 2007; Guglielmelli et al., 2011; Sankaran et al., 2011) |
| miR-376a                                    | Downregulation in NE                                                | Negative                                 | human | CDK2 and Ago2                                      | (Wang et al., 2011)                                          |
| miR-144                                     | Upregulation in DE (homozygous sickle cell disease, HbSS)           | Modulates oxidative stress tolerance     | human | NRF2                                               | (Sangokoya et al., 2010)                                     |
| miR-103                                     | Downregulation in NE                                                | Negative                                 | human | FOXJ2                                              | (Yang et al., 2009)                                          |
| miR-210                                     | Upregulation in NE                                                  | Induces $\gamma$ -globin gene expression | human | N/A                                                | (Bianchi et al., 2009)                                       |
| miR-128                                     | Downregulation in AML than ALL                                      | N/A                                      | human |                                                    | (Mi et al., 2007; Zhu et al., 2012)                          |
| <b>Other important hematopoietic miRNAs</b> |                                                                     |                                          |       |                                                    |                                                              |
| miR-125b                                    | Upregulation in AML; Downregulation in myeloid differentiation (MD) | Oncomir in AML; Negative in MD           |       | Bak1, Stat3, c-Jun, Dicer1, St18, Klf13, Lin28A... | (Zhang et al., 2011a)                                        |
| miR-17~9<br>2 cluster                       | Upregulation in AML; Downregulation in MD                           | Oncomir in AML; Negative in MD           |       | Egr2, SQSTM1, E2F, BIM, PTEN...                    | (He et al., 2013)                                            |
| miR-146a                                    | Upregulation in MD                                                  | Positive in MD                           |       | IRAK1, TRAF6                                       | (Taganov et al., 2006)                                       |
| miR-155                                     | Upregulation in MDS and AML                                         | Oncomir in AML                           |       | PU.1, C/EBP- $\beta$ , SHIP1                       | (Faraoni et al., 2012; Marcucci et al., 2013)                |

#### \*Supplemental References

Bianchi, N., Zuccato, C., Lampronti, I., Borgatti, M., and Gambari, R. (2009). Expression of miR-210 during erythroid differentiation and induction of gamma-globin gene expression. *BMB Rep* 42, 493-499.

Bruchova-Votavova, H., Yoon, D., and Prchal, J.T. (2010). miR-451 enhances erythroid differentiation in K562 cells. *Leuk Lymphoma* 51, 686-693.

Bruchova, H., Yoon, D., Agarwal, A.M., Mendell, J., and Prchal, J.T. (2007). Regulated expression of microRNAs in normal and polycythemia vera erythropoiesis. *Exp Hematol* 35, 1657-1667.

Choong, M.L., Yang, H.H., and McNiece, I. (2007). MicroRNA expression profiling during human cord blood-derived CD34 cell erythropoiesis. *Exp Hematol* 35, 551-564.

Dickstein, J., Senyuk, V., Premanand, K., Laricchia-Robbio, L., Xu, P., Cattaneo, F., Fazzina, R., and Nucifora, G. (2010). Methylation and silencing of miRNA-124 by EVI1 and self-renewal exhaustion of hematopoietic stem cells in murine myelodysplastic syndrome. *Proc Natl Acad Sci USA* 107, 9783-9788.

Faraoni, I., Laterza, S., Ardiri, D., Ciardi, C., Fazi, F., and Lo-Coco, F. (2012). MiR-424 and miR-155 deregulated expression in cytogenetically normal acute myeloid leukaemia: correlation with NPM1 and FLT3 mutation status. *J Hematol Oncol* 5, 26.

Felli, N., Fontana, L., Pelosi, E., Botta, R., Bonci, D., Facchiano, F., Liuzzi, F., Lulli, V., Morsilli, O., Santoro, S., *et al.* (2005). MicroRNAs 221 and 222 inhibit normal erythropoiesis and erythroleukemic cell growth via kit receptor down-modulation. *Proc Natl Acad Sci USA* 102, 18081-18086.

Felli, N., Pedini, F., Romania, P., Biffoni, M., Morsilli, O., Castelli, G., Santoro, S., Chicarella, S., Sorrentino, A., Peschle, C., *et al.* (2009). MicroRNA 223-dependent expression of LMO2 regulates normal erythropoiesis. *Haematologica* 94, 479-486.

Grabher, C., Payne, E.M., Johnston, A.B., Bolli, N., Lechman, E., Dick, J.E., Kanki, J.P., and Look, A.T. (2011). Zebrafish microRNA-126 determines hematopoietic cell fate through c-Myb. *Leukemia* 25, 506-514.

Guglielmelli, P., Tozzi, L., Bogani, C., Iacobucci, I., Ponziani, V., Martinelli, G., Bosi, A., and Vannucchi, A.M. (2011). Overexpression of microRNA-16-2 contributes to the abnormal erythropoiesis in polycythemia vera. *Blood* 117, 6923-6927.

He, M., Wang, Q.Y., Yin, Q.Q., Tang, J., Lu, Y., Zhou, C.X., Duan, C.W., Hong, D.L., Tanaka, T., Chen, G.Q., *et al.* (2013). HIF-1alpha downregulates miR-17/20a directly targeting p21 and STAT3: a role in myeloid leukemic cell differentiation. *Cell Death Differ* 20, 408-418.

Huang, X., Gschweng, E., Van Handel, B., Cheng, D., Mikkola, H.K., and Witte, O.N. (2011). Regulated expression of microRNAs-126/126\* inhibits erythropoiesis from human embryonic stem cells. *Blood* 117, 2157-2165.

Lin, X., Rice, K.L., Buzzai, M., Hexner, E., Costa, F.F., Kilpivaara, O., Mullally, A., Soares, M.B., Ebert, B.L., Levine, R., *et al.* (2013). miR-433 is aberrantly expressed in myeloproliferative neoplasms and suppresses hematopoietic cell growth and differentiation. *Leukemia* 27, 344-352.

Lu, J., Guo, S., Ebert, B.L., Zhang, H., Peng, X., Bosco, J., Pretz, J., Schlanger, R., Wang, J.Y., Mak, R.H., *et al.* (2008). MicroRNA-mediated control of cell fate in megakaryocyte-erythrocyte progenitors. *Dev Cell* 14, 843-853.

Marcucci, G., Maharry, K.S., Metzeler, K.H., Volinia, S., Wu, Y.Z., Mrozek, K., Nicolet, D., Kohlschmidt, J., Whitman, S.P., Mender, J.H., *et al.* (2013). Clinical role of microRNAs in cytogenetically normal acute myeloid leukemia: miR-155 upregulation independently identifies high-risk patients. *J Clin Oncol* 31, 2086-2093.

Mi, S., Lu, J., Sun, M., Li, Z., Zhang, H., Neilly, M.B., Wang, Y., Qian, Z., Jin, J., Zhang, Y., *et al.* (2007). MicroRNA expression signatures accurately discriminate acute lymphoblastic leukemia from acute myeloid leukemia. *Proc Natl Acad Sci USA* 104, 19971-19976.

Pase, L., Layton, J.E., Kloosterman, W.P., Carradice, D., Waterhouse, P.M., and Lieschke, G.J. (2009). miR-451 regulates zebrafish erythroid maturation in vivo via its target gata2. *Blood* 113, 1794-1804.

Patrick, D.M., Zhang, C.C., Tao, Y., Yao, H., Qi, X., Schwartz, R.J., Jun-Shen Huang, L., and Olson, E.N. (2010). Defective erythroid differentiation in miR-451 mutant mice mediated by 14-3-3zeta.

Genes Dev 24, 1614-1619.

Rasmussen, K.D., Simmini, S., Abreu-Goodger, C., Bartonicek, N., Di Giacomo, M., Bilbao-Cortes, D., Horos, R., Von Lindern, M., Enright, A.J., and O'Carroll, D. (2010). The miR-144/451 locus is required for erythroid homeostasis. *J Exp Med* 207, 1351-1358.

Sangokoya, C., Telen, M.J., and Chi, J.T. (2010). microRNA miR-144 modulates oxidative stress tolerance and associates with anemia severity in sickle cell disease. *Blood* 116, 4338-4348.

Sankaran, V.G., Menne, T.F., Scepanovic, D., Vergilio, J.A., Ji, P., Kim, J., Thiru, P., Orkin, S.H., Lander, E.S., and Lodish, H.F. (2011). MicroRNA-15a and -16-1 act via MYB to elevate fetal hemoglobin expression in human trisomy 13. *Proc Natl Acad Sci USA* 108, 1519-1524.

Svasti, S., Masaki, S., Penglong, T., Abe, Y., Winichagoon, P., Fucharoen, S., and Umemura, T. (2010). Expression of microRNA-451 in normal and thalassemic erythropoiesis. *Ann Hematol* 89, 953-958.

Taganov, K.D., Boldin, M.P., Chang, K.J., and Baltimore, D. (2006). NF-kappaB-dependent induction of microRNA miR-146, an inhibitor targeted to signaling proteins of innate immune responses. *Proc Natl Acad Sci USA* 103, 12481-12486.

Vazquez, I., Maicas, M., Marcotegui, N., Conchillo, A., Guruceaga, E., Roman-Gomez, J., Calasanz, M.J., Agirre, X., Prosper, F., and Odero, M.D. (2010). Silencing of hsa-miR-124 by EVI1 in cell lines and patients with acute myeloid leukemia. *Proc Natl Acad Sci USA* 107, E167-168; author reply E169-170.

Wang, F., Yu, J., Yang, G.H., Wang, X.S., and Zhang, J.W. (2011). Regulation of erythroid differentiation by miR-376a and its targets. *Cell Res* 21, 1196-1209.

Yang, G.H., Wang, F., Yu, J., Wang, X.S., Yuan, J.Y., and Zhang, J.W. (2009). MicroRNAs are involved in erythroid differentiation control. *J Cell Biochem* 107, 548-556.

Yuan, J.Y., Wang, F., Yu, J., Yang, G.H., Liu, X.L., and Zhang, J.W. (2009). MicroRNA-223 reversibly regulates erythroid and megakaryocytic differentiation of K562 cells. *J Cell Mol Med* 13, 4551-4559.

Zhang, H., Luo, X.Q., Feng, D.D., Zhang, X.J., Wu, J., Zheng, Y.S., Chen, X., Xu, L., and Chen, Y.Q. (2011a). Upregulation of microRNA-125b contributes to leukemogenesis and increases drug resistance in pediatric acute promyelocytic leukemia. *Mol Cancer* 10, 108.

Zhang, L., Flygare, J., Wong, P., Lim, B., and Lodish, H.F. (2011b). miR-191 regulates mouse erythroblast enucleation by down-regulating *Riok3* and *Mxi1*. *Genes Dev* 25, 119-124.

Zhu, Y., Wang, D., Wang, F., Li, T., Dong, L., Liu, H., Ma, Y., Jiang, F., Yin, H., Yan, W., *et al.* (2013). A comprehensive analysis of GATA-1-regulated miRNAs reveals miR-23a to be a positive modulator of erythropoiesis. *Nucleic Acids Res* 41, 4129-4143.

Zhu, Y.D., Wang, L., Sun, C., Fan, L., Zhu, D.X., Fang, C., Wang, Y.H., Zou, Z.J., Zhang, S.J., Li, J.Y., *et al.* (2012). Distinctive microRNA signature is associated with the diagnosis and prognosis of acute leukemia. *Med Oncol* 29, 2323-2331.
