# Supplementary material
Source: PubMed Central journal article supplement (PMC5339841)
Supplement: cr201726x9.pdf [file cr201726x9.pdf]

## Supplementary information, Figure S2

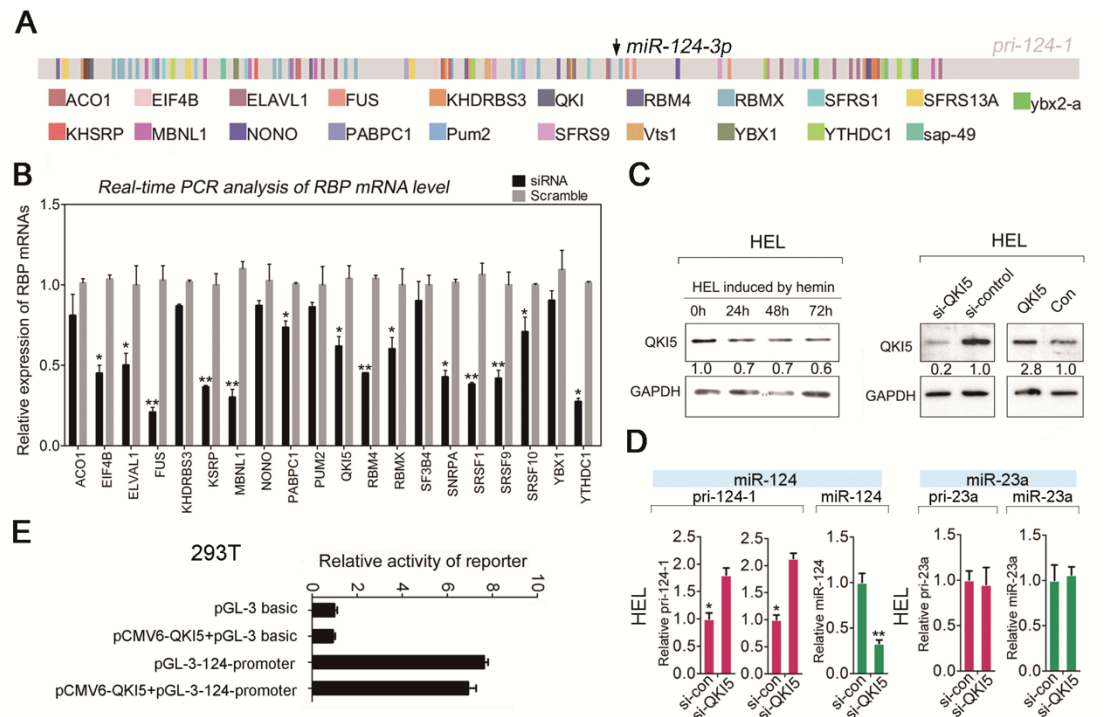

**Figure S2** QKI5 regulates pri-124-1 processing in erythroid cells. **(A)** schematic representation of potential RBP binding sites predicted by RBPDB database. **(B)** Q-PCR analysis of RBP mRNA levels in K562 cells upon 48 h transfection of individual siRNAs corresponding to each RBPs. **(C)** Immunoblot results of QKI5 in HEL cells undergoing erythroid differentiation, or HEL cells transfected with a pCMV6-QKI5 or si\_QKI5 for 48 h. **(D)** Q-PCR results of pri-124-1 and miR-124 from the transfected HEL samples. An irrelevant miR-23a is used as controls. **(E)** The functional activity of QKI5 on the miR-124-1 promoter in dual-luciferase reporter assays. Error bars reflect SEM from three biological replicates if not stated otherwise. Significance was determined by *t*-test with \* $P < 0.05$ ; \*\* $P < 0.01$ .
