# Supplementary material
Source: PubMed Central journal article supplement (PMC5339841)
Supplement: cr201726x11.pdf [file cr201726x11.pdf]

## Supplementary information, Figure S4

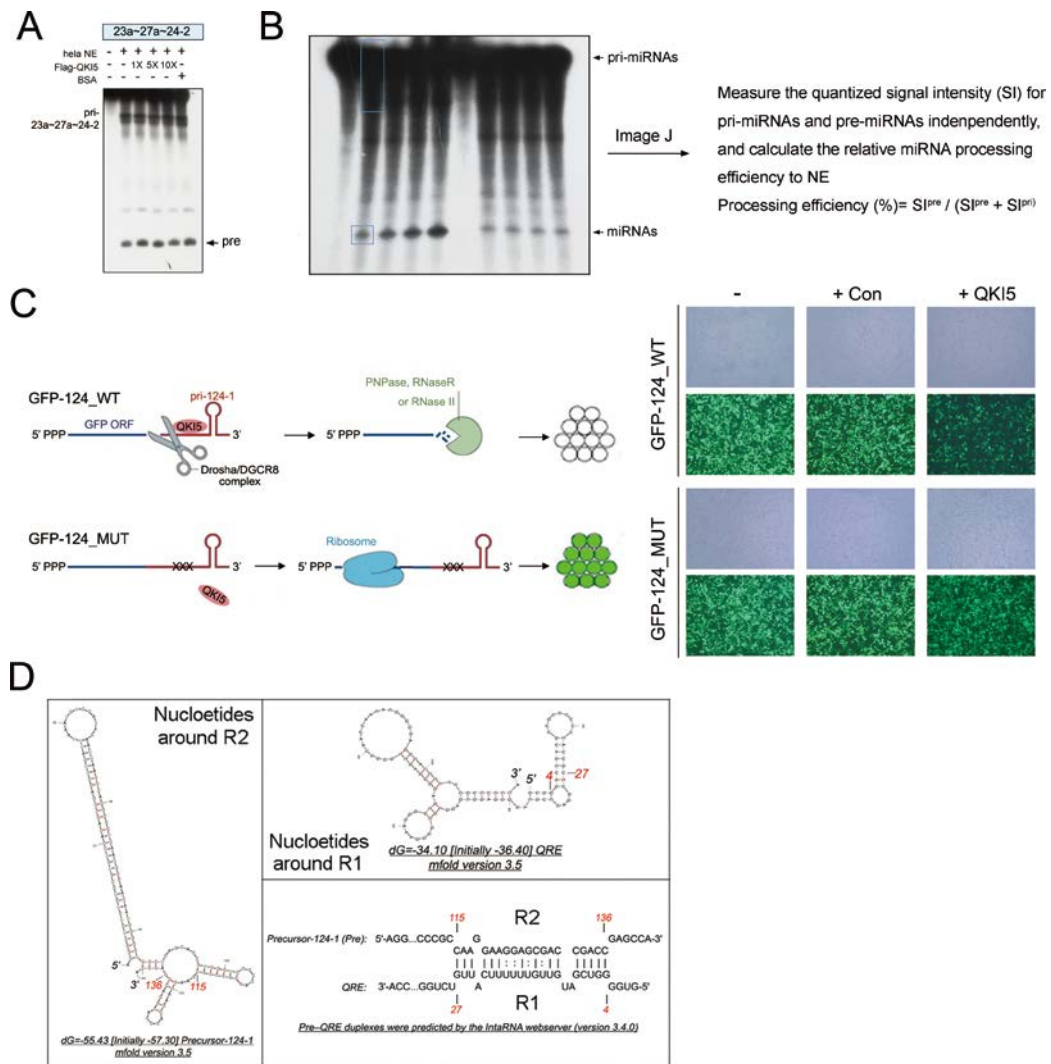

**Figure S4** The regulation of QKI5 on pri-124-1 processing is dependent on the QRE. (A) The *in vitro* processing reaction using [ $\alpha$ - $^{32}$ P] UTP-labeled control pri-23a (23a) as the substrates. Pri-miRNAs are pre-incubated with HeLa NE and various amounts of purified Flag-QKI5 prior to the processing reaction as described in Materials and Methods. (B) Image analysis pipeline for miRNA processing efficiency calculation, related to **Figure 5D** and **5I**. (C) GFP fluorescence images of *in vivo* processing assay in 293T cells co-transfected with GFP-124\_WT/GFP-124\_MUT and pCMV6-QKI5 (+QKI5)/empty vector (+Con). The left panel: A schematic representation of *in vivo* processing assay; the right panel: GFP fluorescence images of 293T cells in *in vivo* processing assay. (D) Predicted secondary structures of nucleotides around the RNA:RNA interaction regions, and predicted duplexes formed by R1 and R2 regions.
