# Supplementary material
Source: PubMed Central journal article supplement (PMC5339841)
Supplement: cr201726x13.pdf [file cr201726x13.pdf]

## Supplementary information, Figure S6

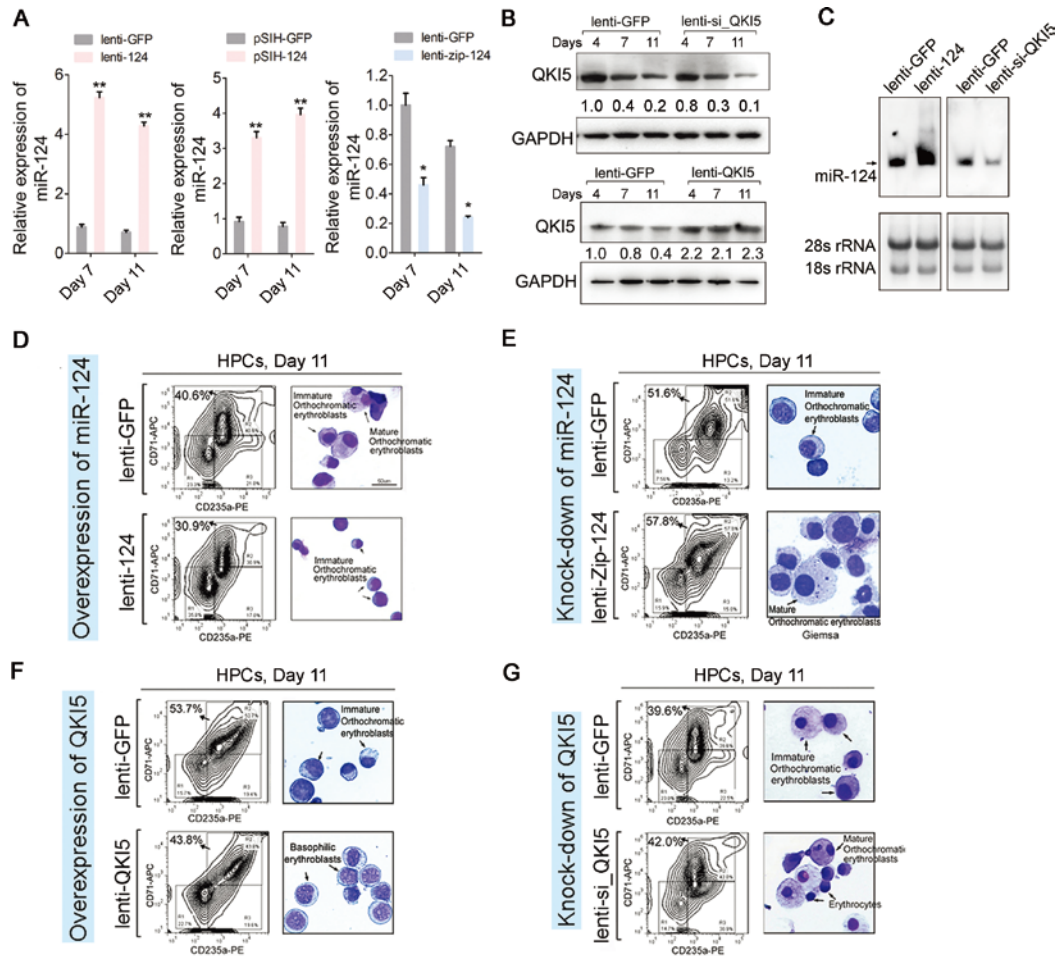

**Figure S6** QKI5 and miR-124 are negative regulators for HPCs erythroid differentiation. **(A)** Q-PCR analysis of miR-124 level in HPCs transduced with either lenti-124 (the left panel: a 600-bp fragment spanning miR-124-QRE is inserted downstream of the pol II promoter), pSIH-124 (the middle panel: an 80-bp fragment only spanning miR-124 stem-loop is inserted downstream of the pol III promoter), or lenti-Zip-124 (the right panel) in E culture at the indicated times. **(B)** Immunoblot analysis of QKI5 in HPCs transduced with lenti-si\_QKI5, lenti-QKI5 or lenti-GFP in E culture at the indicated times. **(C)** The northern blot analysis of miR-124 levels in HPCs transduced with the indicated lentivirus. The 28S and 18S rRNA are used as loading control. **(D-G)** Monitoring of the CD235a/CD71-stained fraction in miR-124-overexpressing **(D)**, miR-124-knockdown **(E)**, QKI5-overexpressing **(F)** and QKI5-knockdown **(G)** HPCs on day 11 of E culture. Error bars reflect SEM from three biological replicates if not stated otherwise. Significance was determined by *t*-test with \**P* < 0.05; \*\**P* < 0.01.
