# Supplementary material
Source: PubMed Central journal article supplement (PMC5339841)
Supplement: cr201726x14.pdf [file cr201726x14.pdf]

## Supplementary information, Figure S7

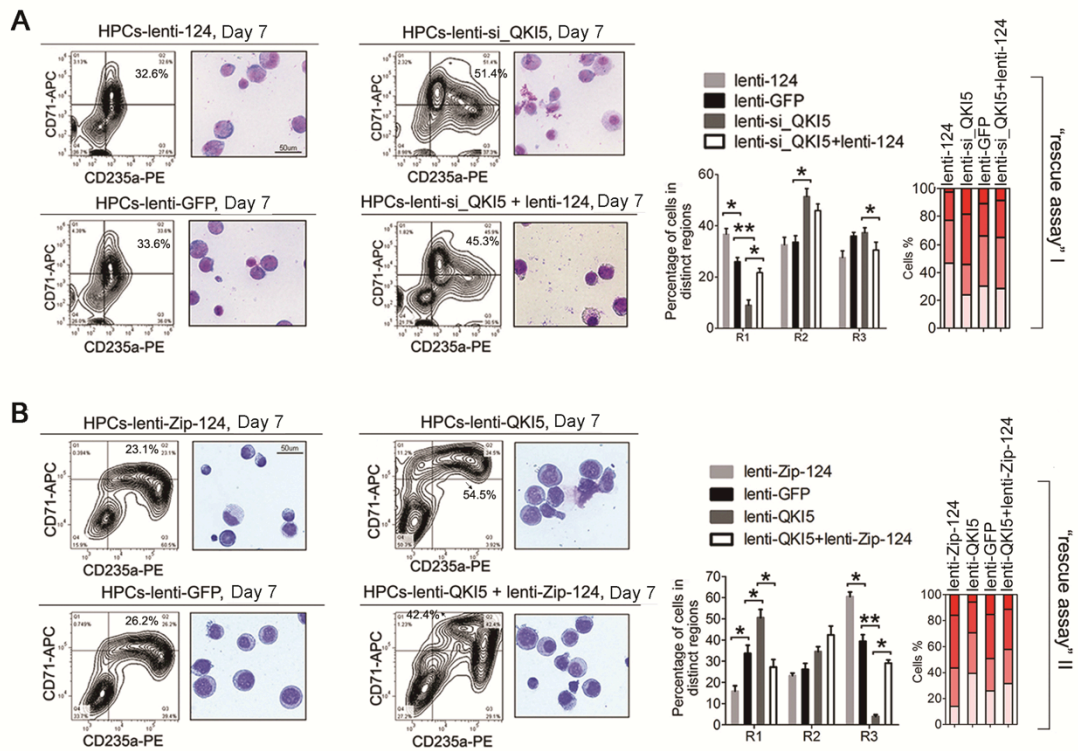

**Figure S7** Functional “rescue assay” in HPCs. **(A)** The left panel: FACS and Giemsa analysis of HPCs transduced with lenti-si\_QKI5 or lenti-GFP control for 24 h. These cells were subsequently treated for another 24 h with lenti-124 or lenti-GFP and cultured for 7 days. Quantitation of the FACS and Giemsa staining results were shown in the right. **(B)** The lower panel: FACS and Giemsa analysis of HPCs transduced with lenti-QKI5 or lenti-GFP control for 24 h. These cells were subsequently treated for another 24 h with lenti-Zip-124 or lenti-GFP and cultured for 7 days. Quantitation of the FACS and Giemsa staining results were shown in the right. Error bars reflect SEM from three biological replicates if not stated otherwise. Significance was determined by *t*-test with  $*P < 0.05$ ;  $**P < 0.01$ .
