# Supplementary material
Source: PubMed Central journal article supplement (PMC5339841)
Supplement: cr201726x15.pdf [file cr201726x15.pdf]

## Supplementary information, Figure S8

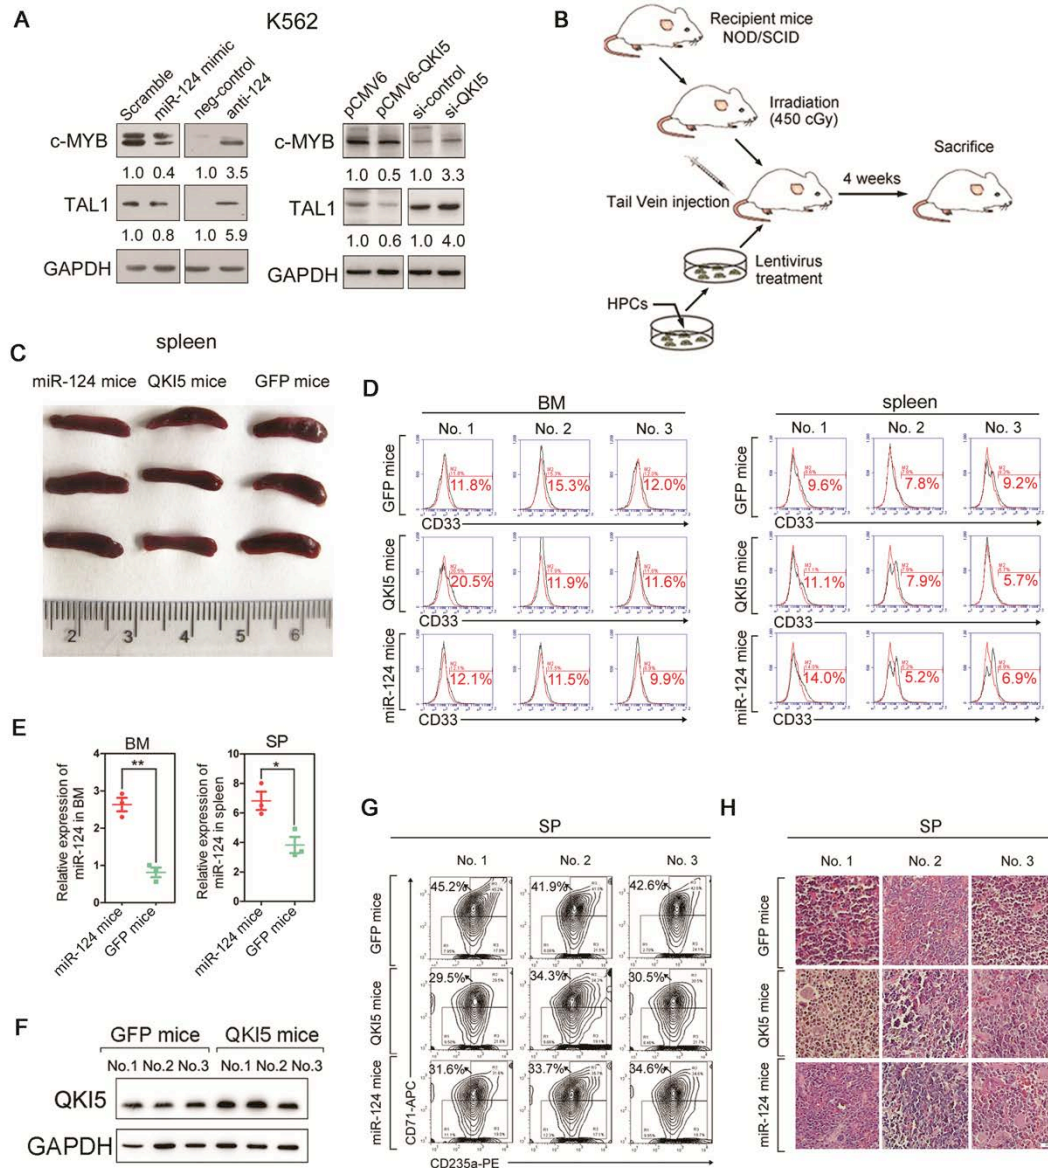

**Figure S8** QKI5 and miR-124 are negative regulators for *in vivo* erythroid differentiation. **(A)** Immunoblot of endogenous levels of c-MYB and TAL1 in K562 cells transfected with miR-124 mimic or Scramble control, and miR-124 inhibitors (anti-124) or negative control (neg-control), and pCMV6-QKI5 or pCMV6, and si-QKI5 or si-control. **(B)** A schematic representation of the establishment of the

human HPC-transplanted mouse model. **(C)** Pictures of mice spleen. **(D)** Monitoring of CD33<sup>+</sup> populations in BM and SP from mice transplanted with lenti-QKI5 transduced HPCs (QKI5 mice), GFP mice and miR-124 mice. **(E)** Q-PCR of miR-124 in BM and SP from miR-124 and GFP mice. **(F)** Immunoblot of QKI5 protein levels in BM of transplanted mice. **(G)** Monitoring of CD235a/CD71-stained fraction in SP from mice transplanted with lenti-QKI5 transduced HPCs (QKI5 mice), GFP mice and miR-124 mice. **(H)** Hematoxylin and eosin-stained sections of spleens harvested from mice at 4 weeks post-transplantation. A 400× magnification of a representative field is shown. Scale bar, 20 μm.
